CORRECTION

# Correction: Characterisation of morphological differences in well-differentiated nasal epithelial cell cultures from preterm and term infants at birth and one-year

Helen E. Groves, Hong Guo-Parke, Lindsay Broadbent, Michael D. Shields, Ultan F. Power

There are errors in the Author Contributions. The correct contributions are: Conceptualization: MDS, UFP, HEG. Data curation: HEG, LB, HGP. Formal analysis: HEG, LB, MDS, UFP. Funding acquisition: MDS, UFP, HEG. Investigation: HEG, HGP, LB, UFP, MDS. Methodology: HGP, HEG, LB, UFP, MDS. Supervision: MDS, UFP. Writing—original draft: HEG. Writing—review & editing: HGP, LB, MDS, UFP.

## Reference

1. Groves HE, Guo-Parke H, Broadbent L, Shields MD, Power UF (2018) Characterisation of morphological differences in well-differentiated nasal epithelial cell cultures from preterm and term infants at birth and one-year. PLoS ONE 13(12): e0201328. <https://doi.org/10.1371/journal.pone.0201328> PMID: 30517096

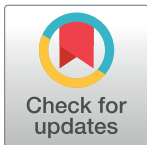

## OPEN ACCESS

**Citation:** Groves HE, Guo-Parke H, Broadbent L, Shields MD, Power UF (2019) Correction: Characterisation of morphological differences in well-differentiated nasal epithelial cell cultures from preterm and term infants at birth and one-year. PLoS ONE 14(1): e0211611. <https://doi.org/10.1371/journal.pone.0211611>

**Published:** January 25, 2019

**Copyright:** © 2019 Groves et al. This is an open access article distributed under the terms of the [Creative Commons Attribution License](https://creativecommons.org/licenses/by/4.0/), which permits unrestricted use, distribution, and reproduction in any medium, provided the original author and source are credited.
